# Supplementary material for: Evaluation of the association of physical activity levels with self-perceived health, depression, and anxiety in Spanish individuals with high cholesterol levels: a retrospective cross-sectional study
Source: PeerJ journal article supplement (doi:10.7717/peerj.17169), 2024-07-15

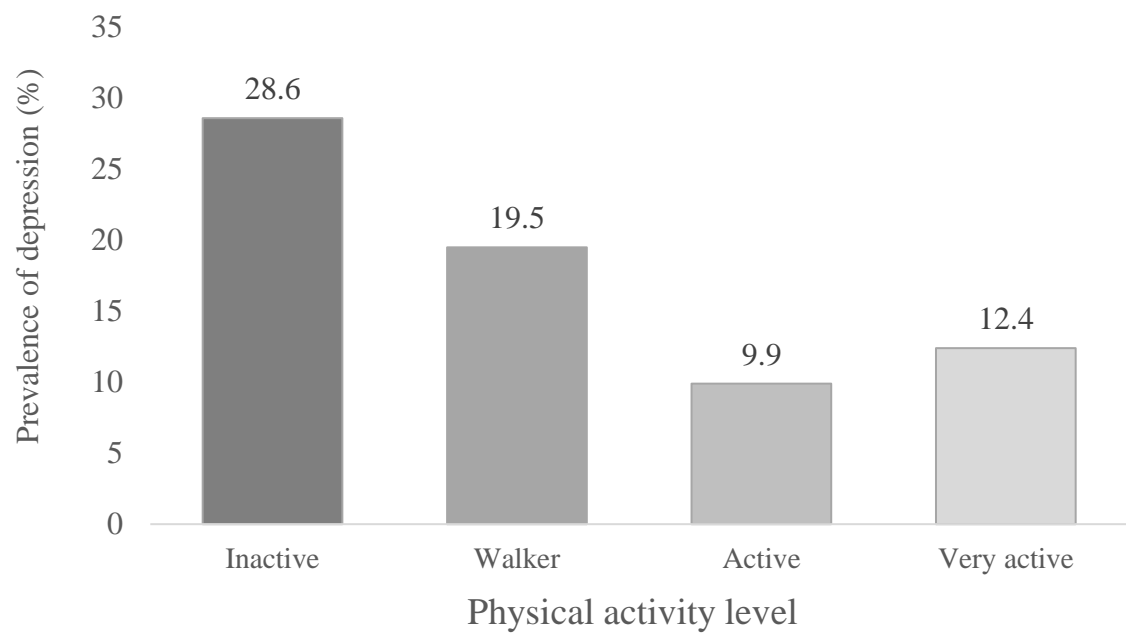

Supplement: FigureS1.pdf [file FigureS1.pdf]
